1                   **Effects of long-term closed environment on human saliva**  
2                                   **microbiota and salivary cytokines**

3   Yinzhen Zhu <sup>a,b</sup>, Zikai Hao <sup>a,b</sup>, Yuming Fu, <sup>a,b,d</sup>, Jianlou Yang <sup>a,b</sup>, Chen Dong <sup>e\*</sup>, Hong Liu <sup>a,b,c,d,\*</sup>  
4

5   a Beijing Advanced Innovation Centre for Biomedical Engineering, Beihang University, Beijing 102402, China

6   b Institute of Environmental Biology and Life Support Technology, School of Biological Science and Medical  
7   Engineering, Beihang University, Beijing 100083, China

8   c State Key Laboratory of Virtual Reality Technology and Systems, School of Computer Science and Engineering,  
9   Beihang University, Beijing 100083, China

10   d International Joint Research Center of Aerospace Biotechnology & Medical Engineering, Beihang University,  
11   Beijing 100083, China

12   e Laboratory of Sport Nutrition and Intelligent Cooking, Shandong Sport University, Jinan 250102, China  
13

14   \* Both authors are correspondence authors

15   Chen Dong, Laboratory of Sport Nutrition and Intelligent Cooking, Shandong Sport University,  
16   Jinan 250102, China. Email: dongchen@sdpei.edu.cn

17   Hong Liu, Lab of Environmental Biology and Life Support Technology, School of Biological  
18   Science and Medical Engineering, Beihang University, Beijing, 100191, China.

19   Email: lh64@buaa.edu.cn

## 1 **Abstract**

2 Compared with the normal environment, the microbiota in controlled closed cabins such as  
3 space capsules, Lunar/Mars bases have changed. To ensure the health of crewmembers, it's  
4 necessary to understand the effects of these changes on human symbiotic microorganisms and  
5 immunity. In this study, the experimental platform "Lunar Palace 1" with a similar closed and  
6 controlled environment was used to research the effects of changed microbial exposure on human  
7 saliva microbiota and salivary cytokines. This paper studied on four crewmembers who participated  
8 in the third phase of the "Lunar Palace 365" experiment, analyzing the dynamic changes of saliva  
9 microbiota and salivary cytokines, and further studying the correlation between salivary cytokines  
10 and highly abundant genera. According to our data, the crewmembers' saliva microbiota and  
11 salivary cytokines fluctuated smoothly throughout the whole experiment. Although a part of  
12 microbes increased or decreased some times, they recovered quickly after leaving the controlled  
13 environment. The level of IL-6, IL-10 and TNF- $\alpha$  in crewmembers' saliva decreased from normal  
14 environment to the controlled environment, showing reduced levels of oral inflammatory response  
15 in crewmembers. In addition, although there were significant individual differences in  
16 crewmembers' saliva microbiota, sharing living space reduced the difference. Furthermore, the level  
17 of TNF- $\alpha$  showed a consistent positive correlation with the abundance of *Actinomyces* and *Rothia*  
18 in the controlled environment, indicating healthy individuals' oral mucosal barrier may be sensitive  
19 to changes in saliva microbiota. According to the result, semi-sterile environments in controlled  
20 closed cabins didn't cause persistent changes in human saliva microbiota and oral immunity. Besides,  
21 it provides a new idea for future research on the impact of the controlled environment on  
22 crewmembers health, and provides guidance for studying the effect of semi-sterile environments on  
23 human immunity based on saliva microbiota.

## 24 **Key points**

- 25 (1) Saliva microbes kept stable for individual but got convergent when sharing space;
- 26 (2) The level of salivary cytokines reduced after entering the controlled environment;
- 27 (3) There were complex correlations between salivary cytokines and saliva microbes;
- 28 (4) The crewmembers adapt well to the controlled environment.

29 **Keywords:** Controlled environment, Saliva microbiota, Salivary cytokines

## 1 Introduction

2 Long-term space missions and the prospect for future life in space promote research on the  
3 health of astronauts(White and Averner 2001). Studies have found that extreme pressure  
4 environments such as microgravity, cosmic radiation and semi-sterile environments have an effect  
5 on the human microbiome, the human immune system and the intricate balance between both,  
6 causing impaired immunity and increased susceptibility(Crucian et al. 2014, Gueguinou et al. 2009,  
7 Mermel 2013, Taylor 1993). The first two factors have been widely concerned, but the impact of  
8 closed isolation environment on symbiotic microorganisms and astronauts' health is only noticed  
9 recently(Saei and Barzegari 2012).

10 Oral cavity is the gateway for pathogens and toxicant to invade human. Oral microbiota plays  
11 a vital role in maintaining oral and general health. Oral mucosal epithelial cells and dendritic cells  
12 can distinguish symbiotic and pathogenic microorganisms by pattern recognition receptors such as  
13 Toll-like receptors, and mediate immune inflammatory response to potential invading pathogens or  
14 immune tolerance to systemic microorganisms(Feller et al. 2013, Moutsopoulos and Konkel 2018).  
15 Disorders of oral microbiota not only cause various oral infectious diseases, but also relevant to  
16 digestive diseases, cardiovascular diseases, diabetes, rheumatoid arthritis, et.al.(He et al. 2015,  
17 Scannapieco 2013). Therefore, researching the chang of astronauts' oral microbial community in  
18 space missions can provide some guidance for revealing oral and general health of astronauts.

19 Recently, studies find that long-term space flight can cause change in astronauts' oral  
20 microbiota, causing oral and systemic inflammatory diseases. In Skylab missions, moderate  
21 increases were observed in the in-flight increments of dental plaque, calculus, and gingival  
22 inflammation, and increased counts of oral *Streptococcus*, *Neisseria*, *Lactobacilli*, and *Enteric*  
23 *bacilli* was detected after flight(Brown et al. 1976). Besides, other studies found that astronauts may  
24 suffer from conjunctivitis, upper respiratory tract infections, viral gastroenteritis, rhinitis and skin  
25 infections(Taylor and Sommer 2005). In the past, it was thought that the main factors causing it  
26 were microgravity and radiation, and the effects of semi-sterile environments in closed isolation  
27 cabins on human health was unclear.

28 Bioregenerative Life Support Systems (BLSS) can provide sustainable life support in a closed  
29 artificial ecosystem and is the future direction of space stations and planetary bases(Drake et al.  
30 2010, Zheng et al. 2008). Lunar Palace 1 (LP1) is one of the most advanced BLSS, offering an  
31 unique confined environment. It is a good experimental model for studying the effects of space  
32 capsules on human systemic microorganisms and immune disorders. LP1 has the following  
33 characteristics: (1) It is a closed experimental system with no material exchange with the outside  
34 world, which is beneficial to maintain environment microorganisms stable in the system; (2) Weekly  
35 disinfection effectively prevents microbial reproduction and provides a semi-sterile environment for  
36 the crewmembers(Sun et al. 2016); (3) Crewmembers work according to a fixed schedule and  
37 maintain a good psychological situation(Hao et al. 2019). We suspect that long-term living in this  
38 semi-sterile environment will reduce cremembers' exposure of environment microorganisms, which  
39 may cause salivary microbial change and oral inflammatory response reduce. When cremembers  
40 return to the normal environment, increased microbes may cause saliva microbiota alter and oral  
41 inflammatory response increase.

42 To demonstrate our hypothesis, we explored the effect of semi-sterile environment on  
43 cremembers' symbiotic microbes and immune system in BLSS. We monitored saliva microbiota  
44 and salivary cytokines of crewmembers before entering LP1, during living in LP1, and after leaving

1 PL1. This paper mainly studied the changes of crewmembers' saliva microbiota and salivary  
2 cytokines as well as their relationship in BLSS, and discussed the impact of environmental microbial  
3 decreasing on it.

## 4 **Materials and methods**

### 5 **Participants**

6 The participants in this study were four Chinese crewmembers involved in the 3<sup>rd</sup> Phase of the  
7 "Lunar Palace 365" project, including two males (Subject A and B) and two females (Subject C and  
8 D). All crewmembers had no history of smoking, oral disease, serious illness and chronic disease.  
9 Most of their general physical examination indices (performed at the 306th Hospital of PLA, Beijing,  
10 China) before and after 3<sup>rd</sup> Phase were within normal ranges.

### 11 **Study design**

12 The "Lunar Palace 365" project was a 370-day, multicrew, closed experiment carried out in a  
13 ground-based experimental BLSS platform named LP1. Located at the Institute of Environmental  
14 Biology and Life Support Technology, Beihang University, Beijing, China, LP1 was a highly closed  
15 ecosystem integrating efficient higher plant cultivation, animal protein production, urine nitrogen  
16 recycling, and bioconversion of solid waste; it had achieved an overall closure coefficient of 97%  
17 in terms of mass regeneration(Fu et al. 2016). Then we upgraded LP1 in 2016. Currently, it consists  
18 of a comprehensive cabin and two plant cabins with a total area of 160 m<sup>2</sup> and a total volume of 500  
19 m<sup>3</sup>. The comprehensive cabin includes four private bedrooms, a living room, a bathroom, and an  
20 insect culturing room (Fig 1(a)). The "Lunar Palace 365" project was divided into three phases,  
21 completed by two groups (group 1 and group 2) (Fig 1(b)). We explored the temporal dynamics of  
22 the saliva microbiota and salivary cytokines in the group 1 participating to the 3<sup>rd</sup> Phase of the  
23 "Lunar Palace 365" project, including 1 month before entering LP1 and 1 month after returning to  
24 regular life. The experiment was designed as Fig 1 (c).

### 25 **Collection of whole saliva and determination of cytokine in saliva**

26 All saliva samples were collected from 9:30 pm to 10:30 pm to minimize circadian variation  
27 in salivary composition. The crewmembers were not allowed to eat or drink anything except water  
28 and to perform oral hygiene activities including tooth brushing before collection. Saliva was  
29 collected using the spitting method for 10 min. Cellular debris in saliva samples were removed by  
30 centrifuging at 4000× g for 20 min at 4 °C, and supernatants were aliquoted and stored at -80 °C  
31 until further analyses. Cytokines in saliva were quantified using Enzyme-linked Immune Sorbent  
32 Assay (IL-1 $\beta$ , IL-6, IL-10, TNF- $\alpha$ , IFN- $\gamma$ , RGB&CHN).

### 33 **Collection of whole saliva and Illumina HiSeq sequencing**

34 Saliva samples were collected at the time set in Fig 1 (c). Except for water, nothing should be  
35 eaten within 2 hours before sampling, and oral hygiene activities should not be carried out. Saliva  
36 samples were collected as follows: (1) Relax cheeks and gently rub for 30 seconds to produce saliva,  
37 (2) Spit saliva into a 5 ml cryotube and collect about 1 ml of saliva, (3) Add 2 ml saliva preservation  
38 solution to the cryotube and mix it by inversion 10-20 times, (4) Store the cryotube in -20 °C freezers  
39 for further testing.

40 Saliva samples were taken from the -20 °C refrigerator every three months and defrosted for

1 30 minutes. Total bacterial DNA were extracted from samples using the Power Soil DNA Isolation  
2 Kit (MO BIO Laboratories) according to the manufacturer's protocol. The V3-V4 region of the  
3 bacterial 16S rRNA gene was amplified with the common primer pair (Forward primer, 5'-  
4 ACTCCTACGGGAGGCAGCA-3'; reverse primer, 5'- GGACTACHVGGGTWTCTAAT-3')  
5 combined with adapter sequences and barcode sequences. PCR amplification was performed in a  
6 total volume of 50  $\mu$ l, which contained 10  $\mu$ l Buffer, 0.2  $\mu$ l Q5 High-Fidelity DNA Polymerase, 10  
7  $\mu$ l High GC Enhancer, 1  $\mu$ l dNTP, 10 $\mu$ M of each primer, 50 ng genome DNA, and the remaining  
8 volume was supplemented with ddH<sub>2</sub>O. Thermal cycling conditions were as follows: an pre-  
9 denaturation at 95 °C for 5 min, followed by 15 cycles denaturation at 95 °C for 1 min, renaturation  
10 at 50 °C for 1 min and extension at 72 °C for 1 min, with a final extension at 72 °C for 7 min. The  
11 PCR products from the first step PCR were purified through VAHTSTM DNA Clean Beads. A  
12 second round PCR was then performed in a 40 $\mu$ l reaction which contained 20  $\mu$ l 2 $\times$ Phusion HF  
13 MM, 8  $\mu$ l ddH<sub>2</sub>O, 10 $\mu$ l of each primer and 10 $\mu$ l PCR products from the first step. Thermal cycling  
14 conditions were as follows: an pre-denaturation at 98 °C for 30s, followed by 10 cycles denaturation  
15 at 98 °C for 10s, renaturation at 65 °C for 30s and extension at 72 °C for 30s, with a final extension  
16 at 72 °C for 5 min. Next, all PCR products were quantified by Quant-iT™ dsDNA HS Reagent and  
17 pooled together according to the quality ratio 1:1. Finally, agarose gel electrophoresis was  
18 performed at 1.8%. High-throughput sequencing analysis of bacterial rRNA genes was performed  
19 on the purified, pooled sample using the Illumina Hiseq 2500 platform(2 $\times$ 250 paired ends) at  
20 Biomarker Technologies Corporation, Beijing, China.

21 The raw sequence was spliced and filtered using FLASH (version 1.2.11) (Tanja and Salzberg  
22 2011) and Trimmomatic (version 0.33) (Bolger et al. 2014), successively, and then the chimera was  
23 removed using UCHIME (version 8.1) (Edgar et al. 2011) to obtain high quality Tags sequences.  
24 The quality checked 16S rRNA gene sequences were classified into operational taxonomic units  
25 (OTUs) within a 0.03 difference (equivalent to 97% similarity) using USEARCH (version 10.0)  
26 (Robert 2013). Taxonomic classification at different taxonomic levels of these OTU sequences was  
27 done with RDP classifier (version 2.2, <http://sourceforge.net/projects/rdpclassifier/>) (Wang et al.  
28 2007) against the Silva (Release 128, <http://www.arb-silva.de>) (Quast et al. 2012) and UNITE  
29 (Release 7.2, <http://unite.ut.ee/index.php>) (Kõljalg et al. 2013) using a 80% confidence threshold.  
30 Construct a phylogenetic tree at the genus level based on PyNAST(version 1.2.2,  
31 <http://biocore.github.io/pynast/>) (Caporaso et al. 2010) and ClustalW2  
32 (<http://www.ebi.ac.uk/Tools/msa/clustalw2/>) (Larkin et al. 2007), and then calculate the distance  
33 matrix among samples.

34 Sequencing-based 16S rRNA surveys are usually normalized by converting OTU sequence  
35 counts into fractional abundances for each sample. However, this standard technique leads to what  
36 is known as compositional effects (Jonathan and Eric 2012), and may cause false relationships  
37 between OTUs, or between OTUs and cytokines. For the analysis of the saliva microbiota dynamics  
38 over the whole experiment, the normalization technique developed by David et al. (David et al.  
39 2014) was used. Briefly, for each crewmember: (i) Time points were normalized in the standard  
40 manner so that the sum of all fractional OTU abundances at a given time point was 1; (2) Highly  
41 abundant OTUs, accounting for 90% of median time point reads, were selected; (3) each time point  
42 was normalized to a reference community that was computed for each sample based on other time  
43 points with a similar community structure. Specifically, reference OTU values were computed using  
44 a weighted median across time series, with time point weights set to be  $(1 - j)^2$  and  $j$  being the

1 pairwise Jensen-Shannon Distance (JSD) score to the sample being normalized.

## 2 **Statistics**

3 All statistical analyses were conducted with R and MATLAB. As crewmember's saliva  
4 microbiota and salivary cytokines are susceptible to other biotic and abiotic units, theoretically a set  
5 of hypothetical stochastic differential equations could be used to express the influencing  
6 mechanisms of biotic and abiotic factors on the dynamic response of crewmembers' saliva  
7 microbiota and salivary cytokines. If a well-designed BLSS could provide sufficient sustenance  
8 support for the crewmembers, they could be acclimate themselves to the closed environment. Under  
9 this assumption, the crewmembers' saliva microbiota and salivary cytokines variations should be a  
10 stationary stochastic process. We adopted the autocorrelation function (ACF) (McMurry and Politis  
11 2010, 2015) to testify the above assumption by evaluating whether the ACF would be only  
12 dependent on the time interval, rather than time. If they were stationary stochastic process, we used  
13 Mann-Kendall trend test (Libiseller and Grimvall 2002, McCuen 1995) to analyze whether there is  
14 a trend change from the normal environment into LPI. As for the differences among groups in saliva  
15 microbiota, principal component analysis (PCA) and multivariate analysis of variance  
16 (MANOVA) were performed using R packages (reshape 2, ggplot 2 and vegan) and MATLAB (the  
17 MathWorks Inc.), respectively. Further, we analyzed the alpha and beta diversity of saliva  
18 microbiota at different time points and different phases. Depending on the normality and variance  
19 homogeneity of the data, the One-Way ANOVA or Kruskal-Wallis rank sum test was used, and *P*  
20 values were corrected for multiple testing using the Bonferroni method. The relationships among  
21 saliva microbiota and salivary cytokines were analyzed with Spearman's correlation tests using R  
22 (ver 3.5.3) packages (hmisc), then adjusted for multiple comparisons with the FDR correction  
23 method.

## 24 **Results**

### 25 **Individual differences and stability of saliva microbiota**

26 The saliva microbiota of the four crewmembers (subject A to D) were tracked over time during  
27 the third phase of the "Lunar Palace 365" experiment. A total of 70 saliva samples were collected.  
28 Each sample was measured by 16S rRNA gene Illumina HiSeq sequencing (V3-V4 region),  
29 obtaining a total of 3,888,658 pairs of high-quality sequence reads. After splicing and filtering, a  
30 total of 3,312,409 Clean tags were generated (minimum of all sample, 17,811; mean of all sample,  
31 33,820). The dynamics of each crewmembers' oral microbial communities were reconstructed over  
32 time according to the normalization strategy described by David et al.(David et al. 2014). The most  
33 abundant phyla were *Actinobacteria*, *Bacteroidetes*, *Firmicutes*, *Fusobacteria*, *Proteobacteria*,  
34 *Spirochaetes* and *SRI*, accumulating more than 97% in most samples (Fig 2(a)). We selected the  
35 OTUs that existed at more than half of the time points as core OTUs for dynamics analysis. We  
36 obtained 97, 104, 111, and 108 core OTUs in subject A, B, C and D, respectively (Supplementary  
37 Table S1). As shown in Figure 2, these dynamic changes revealed the differences among individuals  
38 were much larger than variation within individuals over time. We further visualized the individual  
39 and gender differences of saliva microbiome using principal component analysis (PCA) (Fig 3(a-  
40 b)). Interestingly, individual and gender differences were differentiated on the PCA score plots (Fig  
41 3(a-b)). We further performed multivariate analysis of variance (MANOVA) to statistically compare  
42 individual and gender differences between different groups. Hierarchical clustering was generated



1 based on mahalanobis distances as a result of MANOVA (Fig 3(c-d)). The MANOVA analysis  
2 showed that there were significant differences ( $p < 0.001$ ) between each individual and gender.

3 Besides, we adopted the autocorrelation function (ACF) to analyze the temporal dynamics of  
4 highly abundant phyla and genera in the whole experiment(McMurry and Politis 2010, 2015). Our  
5 autocorrelation analyses showed that most highly abundant phyla (Supplementary Fig S1) and  
6 genera (Supplementary Fig S2) had no significant autocorrelation, and they were stationary  
7 stochastic process, suggesting that the crewmembers' oral microbiota had no reliable changes with  
8 time during the experiment. Furthermore, Mann-Kendall trend test(Libiseller and Grimvall 2002,  
9 McCuen 1995) was used to analyze whether there was a trending change in the continuous time  
10 period from the normal environment into LP1, the results showed that most of the trend was not  
11 significant ( $P > 0.05$ , Supplementary Table S2).

## 12 **Effects of controlled environment on saliva microbiota**

13 We choose the relative abundance of the core phyla and genera to plot the curves over time, as  
14 shown in Figure 4. Results indicated that the controlled environment caused changes in the relative  
15 abundance of saliva microbiota. At phylum level, *Actinobacteria* showed a brief increase in the first  
16 week after entering LP1 (Fig 4(a)). In the first week of entering LP1, *Bacteroidetes* decreased to  
17 19.18~31.15% of the average abundance before entering LP1, and then quickly recovered. After  
18 leaving LP1, abundance of *Bacteroidetes* returned to the previous level (except Subject B, Fig 4(a)).  
19 Besides, except for Subject D, relative abundance of *Proteobacteria* gradually increased after  
20 entering LP1 and reached 1.51~4.59 times of its relative abundance before entering LP1, then it  
21 gradually decreased and returned to the level before entering LP1(Fig 4(a)). However, change of  
22 *Firmicutes* was completely different for four crewmembers (Fig 4(a)). At genus level, *Rothia* was  
23 the most abundant of *Actinobacteria*, and its trend was consistent with *Actinobacteria* (Fig 4(b)).  
24 *Prevotella* was the most abundant of *Bacteroidetes*, and tendency of *Prevotella* was consistent with  
25 that of *Bacteroidetes*. *Streptococcus* and *Veillonella* were the most abundant of *Firmicutes*, and  
26 change of *Streptococcus* was in accordance with *Firmicutes* (Fig 4). While *Veillonella* decreased  
27 slightly after entering LP1 and recovered after leaving LP1 (Fig 4(b)). *Neisseria* and *Haemophilus*  
28 were the most abundant of *Proteobacteria*. In addition to Subject D, *Neisseria* first increased and  
29 then decreased after entering LP1, reaching the highest level about 1.73~7.28 times compared to the  
30 abundance outside of LP1 within 5 weeks (Fig 4(b)). And *Haemophilus* changed consistently with  
31 *Neisseria* but Subject B (Fig 4(b)).

## 32 **Sharing living space reduced the difference in saliva microbiota among individuals**

33 When exploring the variation of the alpha diversity (i.e., for each crewmember) of the saliva  
34 microbiota over time, it showed apparently random fluctuations, only with large fluctuations in  
35 certain time (Supplementary Fig S3(a)). And the differences among time and experimental phases  
36 were not significant (Kruskal-Wallis rank sum test, Supplementary Fig S3 (b): KW = 16.9120,  
37 P = 0.5292; Supplementary Fig S3 (c): KW = 2.3652, P = 0.3065). Furthermore, we visualized  
38 the overall changes of saliva microbiome over experimental phase using principal component  
39 analysis (PCA) (Fig 5(a)), finding that the three experimental phases could not be completely  
40 separated. We further performed MANOVA to statistically compare the differences between  
41 different experimental phases. Hierarchical clustering was generated based on mahalanobis  
42 distances as a result of MANOVA (Fig 5(b)). The MANOVA analysis showed that there were

1 significant differences ( $p < 0.001$ ) among each experimental phase. To further observe the effect  
2 of controlled environment on saliva microbiota, we compared weighted UniFrac distances among  
3 crewmembers at different time points and different phases. There was no significant difference at  
4 each time point (Kruskal-Wallis rank sum test, Fig 5(c):  $KW = 32.4100$ ,  $P = 0.0197$ ), but the  
5 weighted UniFrac distance decreased in the 3<sup>rd</sup> Phase. It's worthy to note that, the weighted UniFrac  
6 distances at each phase were significantly different, and the 3<sup>rd</sup> Phase was significantly lower than  
7 the other two phases outside LP1 (Kruskal-Wallis rank sum test, Fig 5(d):  $KW = 18.1130$ ,  $P =$   
8  $0.0001$ ).

## 9 **Correlation between saliva microbiota and cytokines in controlled environment**

10 We adopted the autocorrelation function (ACF) to analyze the temporal dynamics of salivary  
11 cytokines (IL-1 $\beta$ , IL-6, IL-10, TNF- $\alpha$  and IFN- $\gamma$ ) in the whole experiment (McMurry and Politis  
12 2010, 2015). Our autocorrelation analyses showed that all the cytokines had no significant  
13 autocorrelation (Supplementary Fig S4), and they were stationary stochastic process, suggesting  
14 that the crewmembers' salivary cytokines had no reliable changes with time during the whole  
15 experiment. Furthermore, using Mann-Kendall trend test (Libiseller and Grimvall 2002, McCuen  
16 1995) to analyze whether there was a trend change in the continuous period from the normal  
17 environment into LP1, as shown in Table 1, IL-1 $\beta$  showed an increasing trend (except Subject A),  
18 IL-6 (except Subject B), IL-10, TNF- $\alpha$  showed a decreasing trend, and IFN- $\gamma$  did not change  
19 consistently. In particular, TNF- $\alpha$  showed a tendency to decrease significantly ( $P < 0.05$ ) except  
20 Subject C.

21 We analyzed the Spearman correlation between highly abundant salivary microbial genera and  
22 salivary cytokines of each crewmember in LP1 (Supplementary Table S3), as shown in Fig 6. Co-  
23 occurrence network of four crewmembers have strong individual characteristics, which of Subject  
24 C was the most complex and showed more complicated correlation among saliva microbiota and  
25 cytokines. It was worth noting that, in addition to Subject D, TNF- $\alpha$  showed a consistent positive  
26 correlation with *Actinomyces* and *Rothia* ( $R \geq 0.5$ ).

## 27 **Discussion**

28 During long-term space missions, health problems such as symbiotic microbial disorders and  
29 impaired immunity often occur because of psychological and environmental pressures, which in  
30 turn affects space missions. The "Lunar Palace 365" project was a multicrew and closed experiment  
31 carried out in LP1, representing an invaluable opportunity to study symbiotic microbial disorders  
32 and immune adaptation problems that humans may face in long-term space missions.

33 Within this context, we explored the temporal dynamics of the saliva microbiota and salivary  
34 cytokines in the four crewmembers participating in the 3<sup>rd</sup> Phase of "Lunar Palace 365", across the  
35 3<sup>rd</sup> Phase of the project, including the period before entering LP1, and after the return to regular life,  
36 and about 6 months of sampling. Previous studies have found changes in oral microbiota (Brown et  
37 al. 1976), infectious diseases (Taylor and Sommer 2005) and decreased immunity (Mermel 2013) in  
38 space missions. In the past, researchers thought that was mainly caused by cosmic radiation,  
39 microgravity and long-term consumption of pre-packaged food. In the "Lunar Palace 365" project,  
40 we kept the crewmembers' diet consistent with regular life by planting food and vegetables, and  
41 studied the effects of closed semi-sterile environment on human saliva microbiota and oral  
42 immunity for the first time.



1 Saliva microbiota is more stable than other symbiotic microorganisms(Costello et al. 2009)  
2 and doesn't change significantly within 1 year for adult(Cameron et al. 2015). Our results are  
3 consistent with previous studies, and the dominant species steadily fluctuate during the experiment,  
4 with no significant tendency (Supplementary Fig S1, Fig S2 and Table S1). Besides, there was no  
5 significant difference in the alpha diversity of the four crewmembers at different time and different  
6 phases (Supplementary Fig S3), indicating that the crewmembers were well adapted to the closed  
7 environment and the salivary microbial community remained stable. Though the oral microbiome  
8 of single person is relatively stable, it's significantly different among individuals(Jakubovics 2015).  
9 Nasidze et al.(Nasidze et al. 2009) analyzed saliva samples of 120 healthy people from 12 countries  
10 and regions worldwide and found the oral microbiota was significantly individual specific. Our  
11 results are consistent with previous studies, and the oral microbial communities of the four  
12 crewmembers show significant individual and gender differences.

13 However, we also found some microorganisms showed transient trends in the closed  
14 environment, including the reduction of *Bacteroidetes* and the increase of *Proteobacteria* (Figure 4  
15 (a)). A study based on 16S pyrosequencing found that oral *Bacteroidetes* was significantly elevated  
16 in patients with periodontitis, while *Proteobacteria* was reduced(Griffen et al. 2012). In addition,  
17 Said et al.(Said et al. 2013) found that patients with inflammatory bowel disease had more abundant  
18 salivary *Bacteroidetes*, accompanied with reduced *Proteobacteria*. Based on previous research, we  
19 believe that trends of highly abundant phyla seem to be beneficial to oral and general health in the  
20 closed environment. Moreover, we found changes in phylum were mainly caused by highly  
21 abundant genus. The changes of *Rothia*, *Prevotella* and *Streptococcus* were consistent with  
22 *Actinobacteria*, *Bacteroidetes* and *Firmicutes*, respectively. And trends of *Neisseria* and  
23 *Haemophilus* were roughly the same as that of *Proteobacteria*. *Prevotella* existed extensively in  
24 human microbiota, and significantly increased in saliva of patients with caries(Yang et al. 2009),  
25 esophagitis(Yang et al. 2009), sinusitis(Li et al. 2009), inflammatory bowel disease(Said et al. 2013),  
26 HIV with hyperviremia(Dang et al. 2012) and bacterial vaginosis(Oakley et al. 2008). In our  
27 results, *Prevotella* was reduced in controlled environment except for Subject D, indicating well  
28 health of crewmembers in controlled environment. In addition, we found *Neisseria* and  
29 *Haemophilus* were elevated in controlled environment, which were associated with type 2  
30 diabetes(Casarin et al. 2013) and oral leukoplakia(Hu et al. 2016), respectively. We suspect that it  
31 may be related to simpler food processing in the controlled environment. Several studies discovered  
32 that oral microbes of hunting people, traditional farmers, Westerners and vegetarians varied greatly,  
33 and finely processed foods resulted in less abundant *Neisseria* and *Haemophilus*(Clemente et al.  
34 2015, Lassalle et al. 2018). Dietary changes in long-term mission play an important role in saliva  
35 microbiota. The increased *Streptococcus* in astronauts' saliva during Skylab missions was thought  
36 to be caused by intakeing of prepared foods (Brown et al. 1976). However, our study did not show  
37 similar results, indicating that ensuring the supply of fresh food by BLSS helped reduce adverse  
38 changes in oral microbiota.

39 In addition, according to the weighted UniFrac beta diversity, the bacterial communities of the  
40 four crewmembers became, to some extent, more similar to each other over time, suggesting a  
41 certain degree of convergence of the temporal dynamics of abundant microbiota taxa in humans  
42 sharing a confined environment. Our previous 105-day closed experiment(Hao et al. 2018) and the  
43 Mars 500 ground-based space simulation(Turroni et al. 2017) found similar phenomena in human  
44 intestinal microbes. Our result is similar to previous studies, although saliva microbiota has strong

1 individual characteristics, small-scale effects due to shared living spaces can significantly affect the  
2 composition of microbial communities(Shaw et al. 2017). Stahringer et al.(Stahringer et al. 2012)  
3 observed the same effect in the salivary microbiome and also found that the salivary microbiomes  
4 of twins became less similar as they grew older and ceased cohabiting, concluding that “nurture  
5 trumps nature” in the salivary microbiome. Our work supporting the dominant role of the  
6 environment in affecting salivary microbiome composition suggests that another important factor  
7 in long-term persistence may be the regular reseeding of the ecosystem with bacteria from the  
8 external environment. This also reminds us to pay attention to crewmembers saliva microbiota and  
9 environmental microbes in long-term space missions. And it is necessary to prevent the breeding of  
10 harmful microorganisms in the space.

11 Cytokines are important components in saliva, participating in host defenses to maintain oral  
12 and systemic health, and providing information on local and system conditions(Farraud et al. 2010).  
13 Our study found that salivary cytokines fluctuate smoothly throughout the experiment. However,  
14 when the crewmembers entered the controlled environment from normal environment, IL-1 $\beta$   
15 showed an increasing trend, IL-6 and IL-10 showed a decreasing trend, and TNF- $\alpha$  showed a  
16 significant downward trend (Table 1). Changes in salivary cytokines may be caused by oral  
17 microbes. Increased periodontal pathogens will enhance stimulations to TLRs, induce Th1 to secrete  
18 IL-2, IFN- $\gamma$ , TNF- $\alpha$  to kill intracellular infection pathogens, and then induce Th2 secretion of IL-4,  
19 IL-5, IL-6, IL-13 to regulate humoral immunity and limit Th1 response(Lazarevic et al. 2010). On  
20 the other hand, oral symbiotic microorganisms can induce the secretion of IL-10 by T-reg cells and  
21 inhibit the activity of effector T cells(Loesche et al. 1975). The crewmembers’ salivary cytokines  
22 showed a decreasing trend in the closed environment, indicating there was no pathogenic change in  
23 saliva microbiota and didn’t cause abnormal inflammatory response.

24 In addition, IL-1 $\beta$  is a pro-inflammatory cytokine stimulated by bacterial lipopolysaccharide,  
25 which participates in the inflammatory response and stimulates immune cells to secrete IL-1 $\beta$ , IL-  
26 2, IL-6, IL-8, TNF- $\alpha$  and IFN- $\gamma$ (Kampoli et al. 2009). In our study, elevated IL-1 $\beta$  may be caused  
27 by psychosocial stress and increased negative emotions. Schbacher et al.(Aschbacher et al. 2009)  
28 found the response of IL-1 $\beta$  to stress had predictive validity for mental health. Szabo et al. (Szabo  
29 et al. 2019) also found that psychosocial stress was associated with higher salivary IL-1 $\beta$ , and  
30 increased negative emotions caused an increase in IL-1 $\beta$ (Newton et al. 2017). Furthermore,  
31 maintaining positive emotions can alleviate negative effects of stress by reducing the inflammatory  
32 response (Fredrickson 2004). Although the crewmembers seemed not to experience psychological  
33 distress in the controlled environment(Hao et al. 2019), Mars 500 has reported symptoms of  
34 depression in 93% of mission weeks in a 520-day ground space simulation experiment(Basner et al.  
35 2013, Basner et al. 2014), and found serum serotonin significantly elevated in the mid-late stage of  
36 the mission(Wang et al. 2014). Serotonin plays an important role in regulating stress(Christine and  
37 C Rob 2007) and enhancing psycho-physiological resistance to chronic stress(Grippio et al. 2005,  
38 Porter et al. 2004, Storey et al. 2006). Driven by the defensive system, unpleasant emotions, such  
39 as anxiety, depression and fear, induce different reflexive automatic and somatic  
40 outputs(Koganemaru et al. 2012, Lang and Bradley 2010, Smith et al. 2005) . In the current study,  
41 when the psychological status of the crewmembers became worse with time, they expressed  
42 withdrawal from the negative stimuli with a positive rating bias. As a result, the secretion of  
43 crewmembers’ salivary IL-1 $\beta$  increased from normal environment to controlled environment, while  
44 the subjective evaluation of the crewmembers showed a good emotional state in the whole

1 experiment.

2 Strong correlations between some inflammatory biomarkers and saliva microbiota  
3 compositions has been revealed, for instance, IL-17 plays an important role in oral antifungal(Wade  
4 2011). Besides, Said et al.(Said et al. 2013) found lower lysozyme and elevated IL-1 $\beta$ , IL-8, IgA in  
5 saliva of patients with inflammatory bowel disease were likely to be synergistically or interactively  
6 associated with the abundance of *Streptococcus*, *Prevotella*, *Veillonella*, and *Haemophilus*.  
7 *Porphyromonas gingivalis* can be colonized in atherosclerotic plaques, stimulating the secretion of  
8 inflammatory factors such as TNF- $\alpha$ , IL-1 $\beta$ , IL-6, and causing inflammation and vascular  
9 endothelial damage(Fåk et al. 2015). We found complex correlations among salivary cytokines and  
10 highly abundant genera in the controlled environment, and TNF- $\alpha$  showed a consistent correlation  
11 with *Actinomyces* and *Rothia*. *Actinomyces* is an early colony in the process of plaque maturation.  
12 Sato et al.(Sato et al. 2012) found peptidoglycans of *Actinomyces naeslundii* can cause the  
13 production of IL-1 $\beta$ , IL-6 and TNF- $\alpha$ . In our study, the positive correlation between TNF- $\alpha$  and  
14 *Actinomyces* confirms their research, and also suggests that decreased TNF- $\alpha$  in saliva of  
15 crewmembers in a controlled environment may be related to decreased *Actinomyces*. Besides,  
16 *Rothia* is a conditional pathogen widely present in human oral cavity, and the most typical species  
17 is *Rothia dentocariosa*. Kataoka et al.(Kataoka et al. 2013) found that *R. dentocariosa* can induce  
18 TNF- $\alpha$  production through TLR2, which is consistent with our findings. Our study suggests that  
19 there is also certain correlation between saliva microbiota and salivary cytokines in healthy  
20 individuals, but disturbed by the daily life environment. When studying the correlation between  
21 saliva microbiota and salivary cytokines, we should consider hosts' health status, diet and living  
22 environment to make the results more accurate.

23 In conclusion, our study proves that the closed isolation semi-sterile environment does not  
24 cause systemic microorganisms and immune disorders, and saliva microbiota and salivary cytokines  
25 fluctuate smoothly throughout the experiment. Although salivary IL-1 $\beta$  has a tendency to increase  
26 in the controlled environment, it is more likely to be a stress response under prolonged stress.  
27 Overall, crewmembers' salivary inflammatory cytokines are reduced in the controlled environment.  
28 In the whole experiment, although salivary microorganisms and salivary cytokines transiently  
29 fluctuated after entering the controlled environment, most of them returned to previous levels after  
30 back to the normal environment, indicating that crewmembers adapted well to the closed isolation  
31 environment without permanent changes. Besides, it provides a new idea for future research on the  
32 impact of closed isolation cabins on crewmembers health, and provides guidance for studying the  
33 effect of semi-sterile environments on human immunity based on saliva microbiota.

## 34 **Funding**

35 This work was supported by the National Natural Science Foundation of China(81871520).

## 36 **Compliance with ethical standards**

### 37 **Ethics approval and consent to participate**

38 We obtained written informed consent from four subjects enrolled in the study. This study was  
39 approved by the Science and Ethics Committee of School of Biological Science and Medical  
40 Engineering in Beihang University, Beijing, China (Approval ID: BM20180003) and complied with  
41 the Helsinki Declaration.

## 1 **Competing interests**

2 The authors declare that they have no competing interests.

## 3 **Author contributions**

4 Y.Z., C.D. and H.L. designed the study. H.L. supervised the study. Y.Z. performed the  
5 experiments. Y.Z., Z.H, Y.F., and J.Y. performed data analysis. Y.Z. and Z.H. wrote the paper. Y.Z.,  
6 Z.H, Y.F., J.Y. , C.D. and H.L. contributed to the editing and revision of the paper. All authors read  
7 and approved the final manuscript.

## 8 **Associated Content**

9 Supplementary materials (PDF, 967kb)

10 Supplementary materials (Excel, 37kb)

## 11 **References**

- 12 Aschbacher K, Epel E, Wolkowitz OM, Prather AA, Puterman E, Dhabhar FS (2009) Maintenance of a  
13 positive outlook during acute stress protects against pro-inflammatory reactivity and future  
14 depressive symptoms. *Brain Behav Immun* 26(2):346-352.  
15 <https://doi.org/10.1016/j.bbi.2011.10.010>
- 16 Basner M, Dinges DF, Mollicone D, Ecker A, Jones CW, Hyder EC, Antonio AD, Savelev I, Kan K, Goel  
17 N (2013) Mars 520-d mission simulation reveals protracted crew hypokinesia and alterations of  
18 sleep duration and timing. *P Natl Acad Sci USA* 110(7):2635-2640.  
19 <https://doi.org/10.1073/pnas.1212646110>
- 20 Basner M, Dinges DF, Mollicone DJ, Savelev I, Ecker AJ, Di Antonio A, Jones CW, Hyder EC, Kan K,  
21 Morukov BV (2014) Psychological and behavioral changes during confinement in a 520-day  
22 simulated interplanetary mission to mars. *PLoS One* 9(3):e93298.  
23 <https://doi.org/10.1371/journal.pone.0093298>
- 24 Bolger AM, Lohse M, Usadel B (2014) Trimmomatic: a flexible trimmer for Illumina sequence data.  
25 *Bioinformatics* 30(15):2114-2120. <https://doi.org/10.1093/bioinformatics/btu170>
- 26 Brown LR, Fromme WJ, Handler SF, Wheatcroft MG, Johnston DA (1976) Effect of Skylab missions on  
27 clinical and microbiologic aspects of oral health. *J Am Dent Assoc* 93(2):357-363.  
28 <https://doi.org/10.14219/jada.archive.1976.0502>
- 29 Cameron SJ, Huws SA, Hegarty MJ, Smith DP, Mur LA (2015) The human salivary microbiome exhibits  
30 temporal stability in bacterial diversity. *FEMS Microbiol Ecol* 91(9):fiv091.  
31 <https://doi.org/10.1093/femsec/fiv091>
- 32 Caporaso JG, Bittinger K, Bushman FD, DeSantis TZ, Andersen GL, Knight R (2010) PyNAST: a  
33 flexible tool for aligning sequences to a template alignment. *Bioinformatics* 26(2):266-267.  
34 <https://doi.org/10.1093/bioinformatics/btp636>
- 35 Casarin RCV, Barbagallo A, Meulman T, Santos VR, Sallum EA, Nociti FH, Duarte PM, Casati MZ,  
36 Gonçalves RB (2013) Subgingival biodiversity in subjects with uncontrolled type-2 diabetes and  
37 chronic periodontitis. *J Periodontal Res* 48(1):30-36. <https://doi.org/10.1111/j.1600-0765.2012.01498.x>
- 39 Christine F, C Rob M (2007) Review: Serotonin by stress interaction: a susceptibility factor for the  
40 development of depression? *J Psychopharmacol* 21(5):538-544.  
41 <https://doi.org/10.1177/0269881106075588>

- 1 Clemente JC, Pehrsson EC, Blaser MJ, Sandhu K, Zhan G, Wang B, Magris M, Hidalgo G, Contreras M,  
2 NoyaAlarcón Ó (2015) The microbiome of uncontacted Amerindians. *Sci Adv* 1(3):e1500183-  
3 e1500183. <https://doi.org/10.1126/sciadv.1500183>
- 4 Costello EK, Lauber CL, Hamady M, Fierer N, Gordon JI, Knight R (2009) Bacterial community  
5 variation in human body habitats across space and time. *Science* 326(5960):1694-1697.  
6 <https://doi.org/10.1126/science.1177486>
- 7 Crucian B, Simpson RJ, Mehta S, Stowe R, Chouker A, Hwang SA, Actor JK, Salam AP, Pierson D,  
8 Sams C (2014) Terrestrial stress analogs for spaceflight associated immune system dysregulation.  
9 *Brain Behav Immun* 39:23-32. <https://doi.org/10.1016/j.bbi.2014.01.011>
- 10 Dang AT, Cotton S, Sankaran-Walters S, Li C-S, Lee C-YM, Dandekar S, Paster BJ, George MD (2012)  
11 Evidence of an increased pathogenic footprint in the lingual microbiome of untreated HIV infected  
12 patients. *BMC Microbiol* 12(1):153. <https://doi.org/10.1186/1471-2180-12-153>
- 13 David LA, Materna AC, Friedman J, Campos-Baptista MI, Blackburn MC, Perrotta A, Erdman SE, Alm  
14 EJ (2014) Host lifestyle affects human microbiota on daily timescales. *Genome Biol* 15(7):R89.  
15 <https://doi.org/10.1186/gb-2014-15-7-r89>
- 16 Drake BG, Hoffman SJ, Beaty DW (2010) Human exploration of Mars, design reference architecture 5.0.  
17 *IEEE Aerospace Conference* 1-24. <https://doi.org/10.1109/AERO.2010.5446736>
- 18 Edgar RC (3013) UPARSE: highly accurate OTU sequences from microbial amplicon reads. *Nat*  
19 *Methods* 10(10):996. <https://doi.org/10.1038/NMETH.2604>
- 20 Edgar RC, Haas BJ, Clemente JC, Christopher Q, Rob K (2011) UCHIME improves sensitivity and speed  
21 of chimera detection. *Bioinformatics* 27(16):2194. <https://doi.org/10.1093/bioinformatics/btr381>
- 22 Fåk F, Tremaroli V, Bergström G, Bäckhed F (2015) Oral microbiota in patients with atherosclerosis.  
23 *Atherosclerosis* 243(2):573-578. <https://doi.org/10.1016/j.atherosclerosis.2015.10.097>
- 24 Farnaud SJ, Kostı O, Getting SJ, Renshaw D (2010) Saliva: physiology and diagnostic potential in health  
25 and disease. *The Scientific world Jo* 10(1):434-456. <https://doi.org/10.1100/tsw.2010.38>
- 26 Feller L, Altini M, Khammissa RA, Chandran R, Bouckaert M, Lemmer J (2013) Oral mucosal immunity.  
27 *Or Surg Or Med Or Pa* 116(5):576-583. <http://dx.doi.org/10.1016/j.oooo.2013.07.013>
- 28 Friedman J, Alm EJ (2012) Inferring correlation networks from genomic survey data. *PLoS Comput Biol*  
29 8(9): e1002687. <https://doi.org/10.1371/journal.pcbi.1002687>
- 30 Fu Y, Li L, Xie B, Dong C, Wang M, Jia B, Shao L, Dong Y, Deng S, Liu H (2016) How to establish a  
31 bioregenerative life support system for long-term crewed missions to the Moon or Mars.  
32 *Astrobiology* 16(12):925. <https://doi.org/10.1089/ast.2016.1477>
- 33 Griffen AL, Beall CJ, Campbell JH, Firestone ND, Kumar PS, Yang ZK, Podar M, Leys EJ (2012)  
34 Distinct and complex bacterial profiles in human periodontitis and health revealed by 16S  
35 pyrosequencing. *ISME J* 6(6):1176-1185. <https://doi.org/10.1038/ismej.2011.191>
- 36 Grippo AJ, Sullivan NR, Damjanoska KJ, Crane JW, Carrasco GA, Shi J, Chen Z, Garcia F, Muma NA,  
37 Kar LDVD (2005) Chronic mild stress induces behavioral and physiological changes, and may alter  
38 serotonin 1A receptor function, in male and cycling female rats. *Psychopharmacology* 179(4):769-  
39 780. <https://doi.org/10.1007/s00213-004-2103-4>
- 40 Gueguinou N, Huin-Schohn C, Bascove M, Bueb JL, Tschirhart E, Legrand-Frossi C, Fripiat JP (2009)  
41 Could spaceflight-associated immune system weakening preclude the expansion of human presence  
42 beyond Earth's orbit? *J Leukoc Biol* 86(5):1027-1038. <https://doi.org/10.1189/jlb.0309167>
- 43 Hao Z, Li L, Fu Y, Liu H (2018) The influence of bioregenerative life-support system dietary structure  
44 and lifestyle on the gut microbiota: a 105-day ground-based space simulation in Lunar Palace 1.



- 1 Environ Microbiol 20(10):3643-3656. <https://doi.org/10.1111/1462-2920.14358>
- 2 Hao Z, Zhu Y, Feng S, Meng C, Hu D, Liu H, Liu H (2019) Effects of long term isolation on the emotion  
3 change of “Lunar Palace 365” crewmembers. Sci Bull 64(13):881-884.  
4 <https://doi.org/10.1016/j.scib.2019.05.019>
- 5 He J, Li Y, Cao Y, Xue J, Zhou X (2015) The oral microbiome diversity and its relation to human diseases.  
6 Folia Microbiol 60(1):69-80. <https://doi.org/10.1007/s12223-014-0342-2>
- 7 Hu X, Zhang Q, Hua H, Chen F (2016) Changes in the salivary microbiota of oral leukoplakia and oral  
8 cancer. Oral Oncol 56:e6-8. <https://doi.org/10.1016/j.oraloncology.2016.03.007>
- 9 Jakubovics NS (2015) A new association for the oral metagenome. Oral Dis 22(2):77–80.  
10 <https://doi.org/10.1111/odi.12421>
- 11 Kampoli AM, Tousoulis D, Antoniadis C, Siasos G, Stefanadis C (2009) Biomarkers of premature  
12 atherosclerosis. Trends Mol Med 15(7):323-332. <https://doi.org/10.1016/j.molmed.2009.06.001>
- 13 Kataoka H, Taniguchi M, Fukamachi H, Arimoto T, Kuwata H (2013) Rothia dentocariosa induces TNF-  
14 alpha production in a TLR2-dependent manner. Pathog Dis 71(1) . <https://doi.org/10.1111/2049-632X.12115>
- 15
- 16 Koganemaru S, Domen K, Fukuyama H, Mima T (2012) Negative emotion can enhance human motor  
17 cortical plasticity. Eur J Neurosci 35(10):1637-1645. <https://doi.org/10.1111/j.1460-9568.2012.08098.x>
- 18
- 19 Kõljalg U, Nilsson RH, Abarenkov K, Tedersoo L, Taylor AFS, Bahram M, Bates ST, Bruns TD,  
20 Bengtsson-Palme J, Callaghan TM (2013) Towards a unified paradigm for sequence-based  
21 identification of fungi. Mol Ecol 22(21):5271-5277. <https://doi.org/10.1111/mec.12481>
- 22 Lang PJ, Bradley MM (2010) Emotion and the motivational brain. Biol Psychol 84(3):437-450.  
23 <https://doi.org/10.1016/j.biopsycho.2009.10.007>
- 24 Larkin MA, Blackshields G, Brown NP, Chenna R, McGettigan PA, McWilliam H, Valentin F, Wallace  
25 IM, Wilm A, Lopez R (2007) Clustal W and clustal X version 2.0. Bioinformatics 23(21):2947-  
26 2948. <https://doi.org/10.1093/bioinformatics/btm404>
- 27 Lassalle F, Spagnoletti M, Fumagalli M, Shaw L, Dyble M, Walker C, Thomas MG, Bamberg Migliano  
28 A, Balloux F (2018) Oral microbiomes from hunter-gatherers and traditional farmers reveal shifts  
29 in commensal balance and pathogen load linked to diet. Mol Ecol 27(1):182-195.  
30 <https://doi.org/10.1111/mec.14435>
- 31 Lazarevic V, Whiteson K, Hernandez D, François P, Schrenzel J (2010) Study of inter- and intra-  
32 individual variations in the salivary microbiota. BMC Genomics 11(1):1-11.  
33 <https://doi.org/10.1186/1471-2164-11-523>
- 34 Li X-X, Wong GL-H, To K-F, Wong VW-S, Lai LH, Chow DK-L, Lau JY-W, Sung JJ-Y, Ding C (2009)  
35 Bacterial microbiota profiling in gastritis without helicobacter pylori infection or non-steroidal anti-  
36 inflammatory drug use. PLoS One 4(11):e7985. <https://doi.org/10.1371/journal.pone.0007985>
- 37 Libiseller C, Grimvall A (2002) Performance of partial Mann–Kendall tests for trend detection in the  
38 presence of covariates. Environmetrics 13(1):71-84. <https://doi.org/10.1002/env.507>
- 39 Loesche WJ, Rowan J, Straffon LH, Loos PJ (1975) Association of *Streptococcus* mutants with human  
40 dental decay. Infect Immun 11(6):1252-1260. [https://doi.org/10.1016/S0399-077X\(76\)80011-X](https://doi.org/10.1016/S0399-077X(76)80011-X)
- 41 McCuen RH (1995) Time series modelling of water resources and environmental systems. J Hydrol  
42 167(1):399-400. [https://doi.org/10.1016/0022-1694\(95\)90010-1](https://doi.org/10.1016/0022-1694(95)90010-1)
- 43 McMurphy TL, Politis DN (2010) Banded and tapered estimates for autocovariance matrices and the linear  
44 process bootstrap. J Time Ser Anal 31(6):471-482. <https://doi.org/10.1111/j.1467->



- 1 [9892.2010.00679.x](https://doi.org/10.1101/2020.10.12.336750)
- 2 McMurry TL, Politis DN (2015) High-dimensional autocovariance matrices and optimal linear  
3 prediction. *Electron J Sta* 9(1):753-788. <https://doi.org/10.1214/15-EJS1000>
- 4 Mermel LA (2013) Infection prevention and control during prolonged human space travel. *Clin Infect*  
5 *Dis* 56(1):123-130. <https://doi.org/10.1093/cid/cis861>
- 6 Moutsopoulos NM, Konkel JE (2018) Tissue-specific immunity at the oral mucosal barrier. *Trends*  
7 *Immunol* 39(4):276-287. <https://doi.org/10.1016/j.it.2017.08.005>
- 8 Nasidze I, Li J, Quinque D, Tang K, Stoneking M (2009) Global diversity in the human salivary  
9 microbiome. *Genome Res* 19(4):636-643. <https://doi.org/10.1101/gr.084616.108>
- 10 Newton TL, Fernandez-Botran R, Lyle KB, Szabo YZ, Miller JJ, Warnecke AJ (2017) Salivary cytokine  
11 response in the aftermath of stress: an emotion regulation perspective. *Emotion* 17(6) .  
12 <https://doi.org/10.1037/emo0000156>
- 13 Oakley BB, Fiedler TL, Marrazzo JM, Fredricks DN (2008) Diversity of human vaginal bacterial  
14 communities and associations with clinically defined bacterial vaginosis. *Appl Environ Microbiol*  
15 74(15):4898-4909. <https://doi.org/10.1128/AEM.02884-07>
- 16 Porter RJ, Gallagher P, Watson S, Young AH (2004) Corticosteroid-serotonin interactions in depression:  
17 a review of the human evidence. *Psychopharmacology* 173(1-2):1-17.  
18 <https://doi.org/10.1007/s00213-004-1774-1>
- 19 Quast C, Pruesse E, Yilmaz P, Gerken J, Schweer T, Yarza P, Peplies J, Glöckner FO (2012) The SILVA  
20 ribosomal RNA gene database project: improved data processing and web-based tools. *Nucleic*  
21 *Acids Res* 41(D1):D590-D596. <https://doi.org/10.1093/nar/gks1219>
- 22 Saei AA, Barzegari A (2012) The microbiome: the forgotten organ of the astronaut's body--probiotics  
23 beyond terrestrial limits. *Future Microbiol* 7(9):1037-1046. <https://doi.org/10.2217/fmb.12.82>
- 24 Said HS, Suda W, Nakagome S, Chinen H, Oshima K, Kim S, Kimura R, Iraha A, Ishida H, Fujita J  
25 (2013) Dysbiosis of salivary microbiota in inflammatory bowel disease and its association with oral  
26 immunological biomarkers. *DNA Res* 21(1):15-25. <https://doi.org/10.1093/dnares/dst037>
- 27 Sato T, Watanabe K, Kumada H, Toyama T, Tani-Ishii N, Hamada N (2012) Peptidoglycan of  
28 *Actinomyces naeslundii* induces inflammatory cytokine production and stimulates  
29 osteoclastogenesis in alveolar bone resorption. *Arch Oral Biol* 57(11):1522-1528.  
30 <https://doi.org/10.1016/j.archoralbio.2012.07.012>
- 31 Scannapieco FA (2013) The oral microbiome: its role in health and in oral and systemic infections. *Clin*  
32 *Microbiol Newsl* 35(20):163-169. <https://doi.org/10.1016/j.clinmicnews.2013.09.003>
- 33 Shaw L, Ribeiro ALR, Levine AP, Pontikos N, Balloux F, Segal AW, Roberts AP, Smith AM (2017) The  
34 human salivary microbiome is shaped by shared environment rather than genetics: evidence from a  
35 large family of closely related individuals. *mBio* 8(5):e01237-01217.  
36 <https://doi.org/10.1128/mBio.01237-17>
- 37 Smith JC, Bradley MM, Lang PJ (2005) State anxiety and affective physiology: effects of sustained  
38 exposure to affective pictures. *Biol Psychol* 69(3):247-260.  
39 <https://doi.org/10.1016/j.biopsycho.2004.09.001>
- 40 Fredrickson BL (2004) The broaden-and-build theory of positive emotions. *T Roy Soc South Aust*  
41 359(1449):1367-1377. <https://doi.org/10.1098/rstb.2004.1512>
- 42 Stahringer SS, Clemente JC, Corley RP, Hewitt J, Knights D, Walters WA, Knight R, Krauter KS (2012)  
43 Nurture trumps nature in a longitudinal survey of salivary bacterial communities in twins from early  
44 adolescence to early adulthood. *Genome Res* 22(11):2146-2152.

- 1 <https://doi.org/10.1101/gr.140608.112>
- 2 Storey JD, Robertson DAF, Beattie JE, Reid IC, Mitchell SN, Balfour DJK (2006) Behavioural and  
3 neurochemical responses evoked by repeated exposure to an elevated open platform. *Behav Brain*  
4 *Res* 166(2):220-229. <https://doi.org/10.1016/j.bbr.2005.08.002>
- 5 Sun Y, Xie B, Wang M, Dong C, Du X, Fu Y, Liu H (2016) Microbial community structure and succession  
6 of airborne microbes in closed artificial ecosystem. *Ecol Eng* 88:165-176.  
7 <https://doi.org/10.1016/j.ecoleng.2015.12.013>
- 8 Szabo YZ, Fernandez-Botran R, Newton TL (2019) Cumulative trauma, emotion reactivity and salivary  
9 cytokine levels following acute stress in healthy women. *Anxiety Stress Coping* 32(1):82-94.  
10 <https://doi.org/10.1080/10615806.2018.1524377>
- 11 Tanja M, Salzberg SL (2011) FLASH: fast length adjustment of short reads to improve genome  
12 assemblies. *Bioinformatics* 27(21):2957-2963. <https://doi.org/10.1093/bioinformatics/btr507>
- 13 Taylor GR (1993) Overview of spaceflight immunology studies. *J Leukocyte Biol* 54(3):179-188.  
14 <https://doi.org/10.1002/jcp.1041560323>
- 15 Taylor PW, Sommer AP (2005) Towards rational treatment of bacterial infections during extended space  
16 travel. *Int J Antimicrob Ag* 26(3):183-187. <https://doi.org/10.1016/j.ijantimicag.2005.06.002>
- 17 Turrone S, Rampelli S, Biagi E, Consolandi C, Severgnini M, Peano C, Quercia S, Soverini M, Carbonero  
18 FG, Bianconi G (2017) Temporal dynamics of the gut microbiota in people sharing a confined  
19 environment, a 520-day ground-based space simulation, MARS500. *Microbiome* 5(1):39.  
20 <https://doi.org/10.1186/s40168-017-0256-8>
- 21 Wade WG (2011) Has the use of molecular methods for the characterization of the human oral  
22 microbiome changed our understanding of the role of bacteria in the pathogenesis of periodontal  
23 disease? *J Clin Periodontol* 11(11):7-16. <https://doi.org/10.1111/j.1600-051X.2010.01679.x>
- 24 Wang Q, Garrity GM, Tiedje JM, Cole JR (2007) Naïve Bayesian classifier for rapid assignment of rRNA  
25 sequences into the new bacterial taxonomy. *Appl Environ Microb* 73(16):5261-5267.  
26 <https://doi.org/10.1128/aem.00062-07>
- 27 Wang Y, Jing X, Lv K, Wu B, Bai Y, Luo Y, Chen S, Li Y (2014) During the long way to Mars: effects  
28 of 520 days of confinement (Mars500) on the assessment of affective stimuli and stage alteration in  
29 mood and plasma hormone levels. *PLoS One* 9(4):e87087.  
30 <https://doi.org/10.1371/journal.pone.0087087>
- 31 White RJ, Averner M (2001) Humans in space. *Nature* 409(6823):1115-1118.  
32 <https://doi.org/10.1038/35059243>
- 33 Yang L, Lu X, Nossa CW, Francois F, Peek RM, Pei Z (2009) Inflammation and intestinal metaplasia of  
34 the distal esophagus are associated with alterations in the microbiome. *Gastroenterology*  
35 137(2):588-597. <https://doi.org/10.1053/j.gastro.2009.04.046>
- 36 Zheng Y, Ouyang Z, Li C, Liu J, Zou Y (2008) China's lunar exploration program: present and future.  
37 *Planet Space Sci* 56(7):881-886. <https://doi.org/10.1016/j.pss.2008.01.002>
- 38

## 1 **Figure captions**

2 **Fig 1: (a) Structure of “Lunar Palace 1”, (b) The mission of “Lunar Palace 365” project, (c) Experimental**  
3 **design: Tube:crewmembers’ salivary cytokines sampling; Eight green dots: crewmembers’ saliva microbiota**  
4 **sampling.**

5  
6 **Fig 2: Saliva microbiota dynamics in the crewmembers throughout the experiment. (a) Percentage stacked**  
7 **graph showing phylum fractional abundances over time. Each ribbon represented a phylum, whose width**  
8 **was proportional to the phylum relative abundance at a given time point (Ribbons at the bottom of each plot**  
9 **indicate that the crewmembers were outside or inside the LP1). We generated the graph using R (ver 3.5.3)**  
10 **packages (ggplot2, plyr and reshape2). (b) Horizon graphs of the relative abundance variation of highly**  
11 **abundant OTUs over time. Time series were mean-centered and curves were divided into colored bands,**  
12 **whose width were the mean absolute deviation, that were then overlaid, with negative values mirrored**  
13 **upwards. Warm and cool colors indicated relative abundance below or above the mean, respectively, the**  
14 **darker the color, the smaller or the greater the OTU abundance. Squares on the vertical axis were colored as**  
15 **in (a). We generated the graph using R (ver 3.5.3) packages (latticeExtra). For the list of highly abundant**  
16 **OTUs, please see Supplementary Table S1.**

17  
18 **Fig 3: The individual and gender differences of saliva microbiome. (a-b) Principal component analyses (PCA)**  
19 **scores plots based on OTUs of the samples at the subject and gender, respectively. (c-d) MANOVA analysis of**  
20 **the different groups. The statistical significance of the separation among different groups was assessed by**  
21 **MANOVA test based on Mahalanobis distances using the first 25 PCs of PCA at the subject and gender. The**  
22 **clusters are computed by applying the single linkage method to the matrix of Mahalanobis distances between**  
23 **group means. \*p<0.05, \*\*p<0.01, \*\*\*p<0.001.**

24  
25 **Fig 4: Crucial phyla and genera dynamics in crewmembers throughout the experiment. Each curve represents**  
26 **a phylum or genus, and shadows indicate that the crewmembers are in LP1.**

27  
28 **Fig 5: Effects of controlled environment on crewmembers’ saliva microbiota. (a) Principal component**  
29 **analyses (PCA) scores plots based on OTUs of the samples at the experimental phase; (b) MANOVA analysis**  
30 **of different experimental phases. The statistical significance of the separation among different groups was**  
31 **assessed by MANOVA test based on Mahalanobis distances using the first 25 PCs of PCA at the experimental**  
32 **phase. The clusters were computed by applying the single linkage method to the matrix of Mahalanobis**  
33 **distances between group means. (c-d) Violin maps of weighted UniFrac distances for crewmembers at the**  
34 **same time or at the same experimental phase. And differences between groups were compared by Kruskal-**  
35 **Wallis rank sum test. \*p<0.05, \*\*p<0.01, \*\*\*p<0.001.**

36  
37 **Fig 6: Co-occurrence network of crewmembers’ salivary cytokines and highly abundant microbial genera in**  
38 **LP1: Select genus with relative abundance over 1%, calculate the spearman correlation coefficient of saliva**  
39 **microbiota and cytokines in LP1, and then generate the graph using R (ver 3.5.3) packages (igraph). Each**  
40 **node represented a microbial genus or a salivary cytokine. Circles colored by phylum represented different**  
41 **genus, and squares represented different cytokines. The size of the nodes was proportional to the microbial**  
42 **abundance or salivary cytokine level. The link between nodes indicated spearman correlation ( $|r| \geq 0.5$ ). The**  
43 **blue and red lines indicate negative correlation and positive correlation, respectively. Particularly, bold**  
44 **indicated significant correlation ( $p \leq 0.05$ ).**

1 **Tables**

2 **Table 1**

3 **Table: Mann-Kendall trend test of salivary cytokines.  $Z > 0$ , the time series showed an increasing trend;  $Z <$**   
 4  **$0$ , the time series showed a decreasing trend;  $P < 0.05$ , the tendency was significant.**

| Cytokine                       | Subject | n  | Mean    | Z statistic | P             | Sample estimates |           |         |
|--------------------------------|---------|----|---------|-------------|---------------|------------------|-----------|---------|
|                                |         |    |         |             |               | S                | varS      | tau     |
| <b>IL-1<math>\beta</math></b>  | A       | 22 | 5.0578  | -0.9023     | 0.3669        | -33              | 1257.6667 | -0.1429 |
|                                | B       | 22 | 5.8656  | 0.4512      | 0.6519        | 17               | 1257.6670 | 0.0736  |
|                                | C       | 22 | 4.8195  | 1.2407      | 0.2147        | 45               | 1257.6667 | 0.1948  |
|                                | D       | 22 | 5.6441  | 1.8047      | 0.0711        | 65               | 1257.6667 | 0.2814  |
| <b>IL-6</b>                    | A       | 22 | 10.7015 | -1.9464     | 0.0516        | -70              | 1256.6667 | -0.3037 |
|                                | B       | 22 | 9.6946  | 1.2407      | 0.2147        | 45               | 1257.6667 | 0.1948  |
|                                | C       | 22 | 9.7380  | -0.8459     | 0.3976        | -31              | 1257.6667 | -0.1342 |
|                                | D       | 22 | 11.8152 | -0.5076     | 0.6118        | -19              | 1257.6667 | 0.6118  |
| <b>IL-10</b>                   | A       | 22 | 3.3009  | -0.9023     | 0.3669        | -33              | 1257.6667 | -0.1429 |
|                                | B       | 22 | 3.1938  | -1.6919     | 0.0907        | -61              | 1257.6667 | -0.2641 |
|                                | C       | 22 | 3.0636  | -1.5791     | 0.1143        | -57              | 1257.6667 | -0.2468 |
|                                | D       | 22 | 3.4684  | -2.2558     | <b>0.0241</b> | -81              | 1257.6667 | -0.3506 |
| <b>TNF-<math>\alpha</math></b> | A       | 22 | 17.7964 | -2.4270     | <b>0.0152</b> | -87              | 1257.6667 | -0.3783 |
|                                | B       | 22 | 17.5217 | -2.3686     | <b>0.0179</b> | -85              | 1257.6667 | -0.3680 |
|                                | C       | 22 | 16.7170 | -0.8459     | 0.3976        | -31              | 1257.6667 | -0.1342 |
|                                | D       | 22 | 17.9889 | -2.9890     | <b>0.0028</b> | -107             | 1257.6667 | -0.4632 |
| <b>IFN-<math>\gamma</math></b> | A       | 22 | 2.2153  | -1.5227     | 0.1278        | -55              | 1257.6667 | -0.2381 |
|                                | B       | 22 | 2.1919  | 0.0000      | 1.0000        | -1               | 1257.6667 | -0.0043 |
|                                | C       | 22 | 1.8623  | -2.1721     | <b>0.0299</b> | -78              | 1257.6667 | -0.3384 |
|                                | D       | 22 | 2.3966  | 0.5924      | 0.5536        | 22               | 1257.6667 | 0.0954  |

5

1 **Figures**

2 **Fig 1**

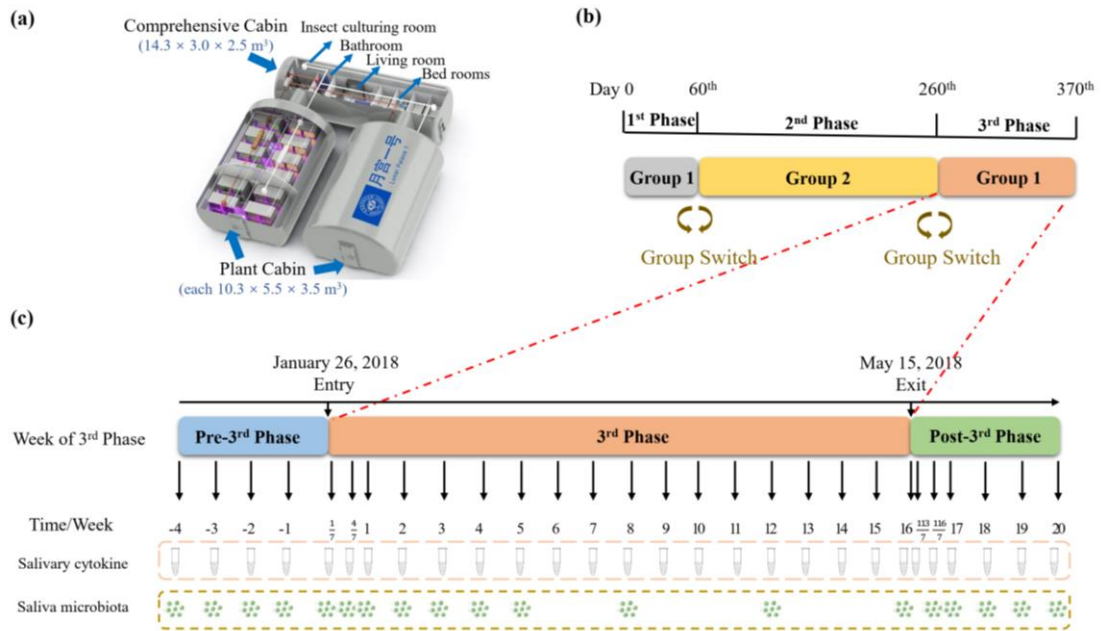

3

4

1 **Fig 2**

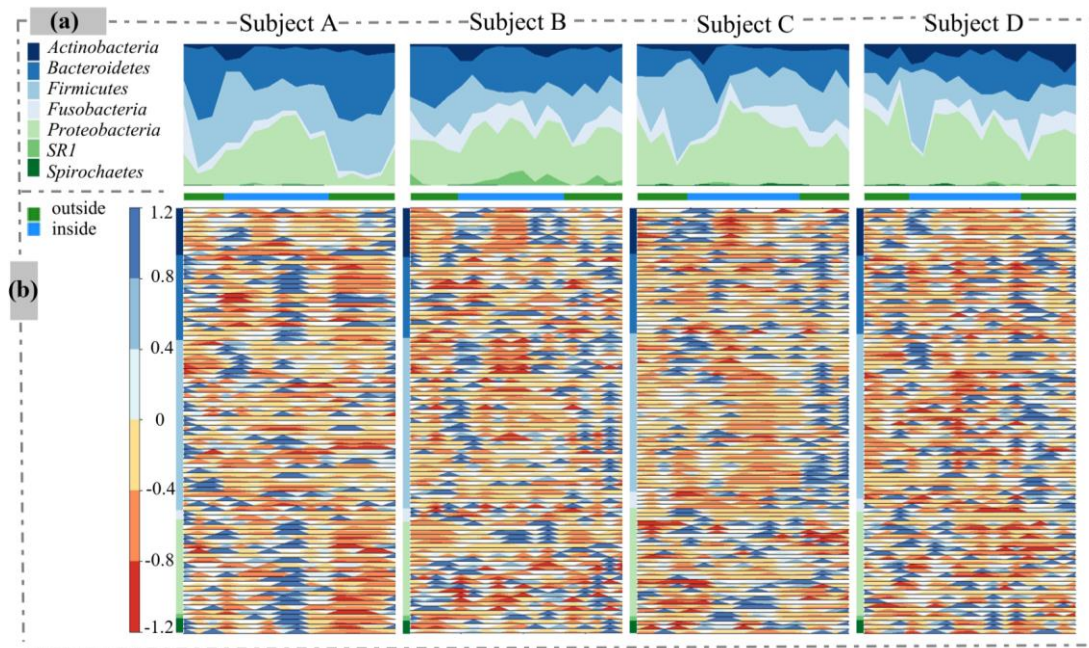

2  
3



1 **Fig 3**

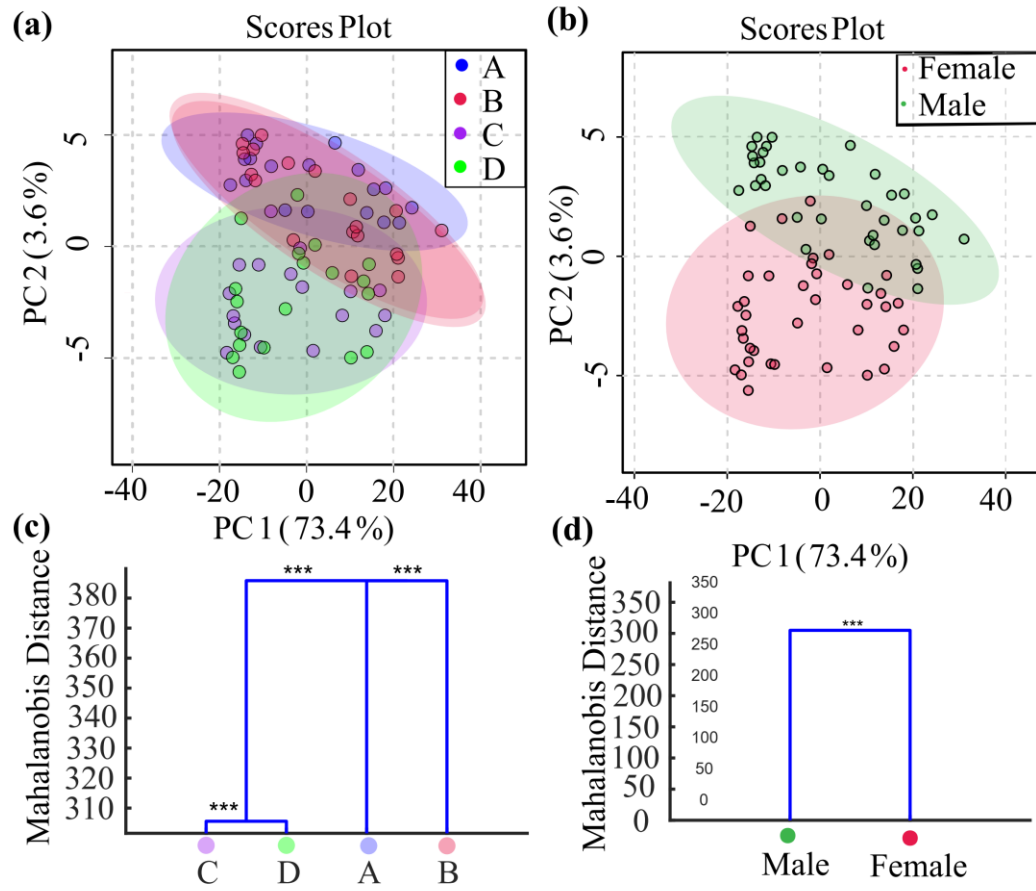

2

1 **Fig 4**

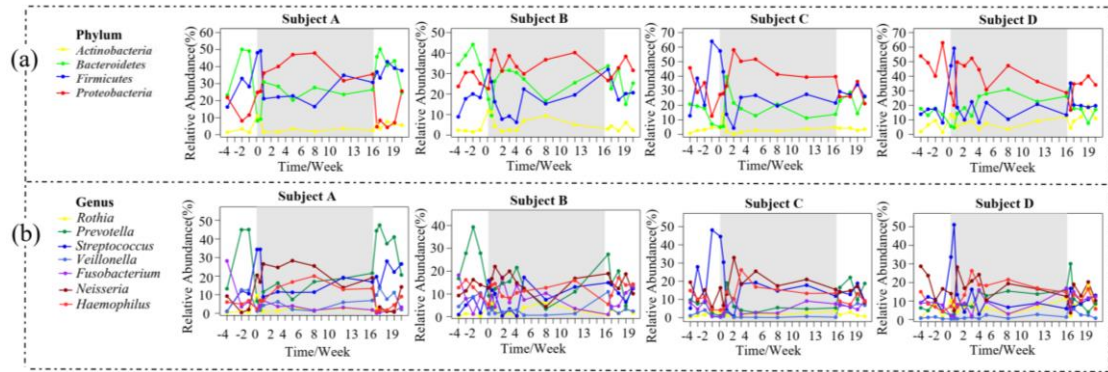

2

3

1 **Fig 5**

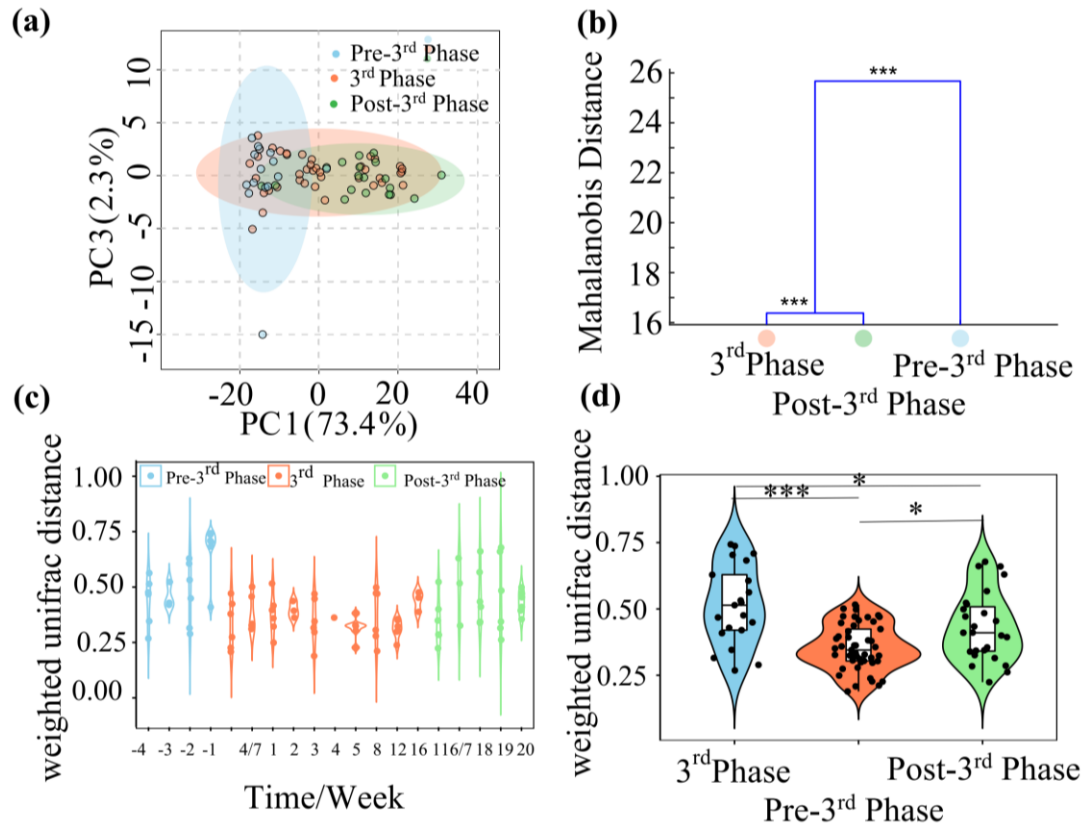

2

1 Fig 6

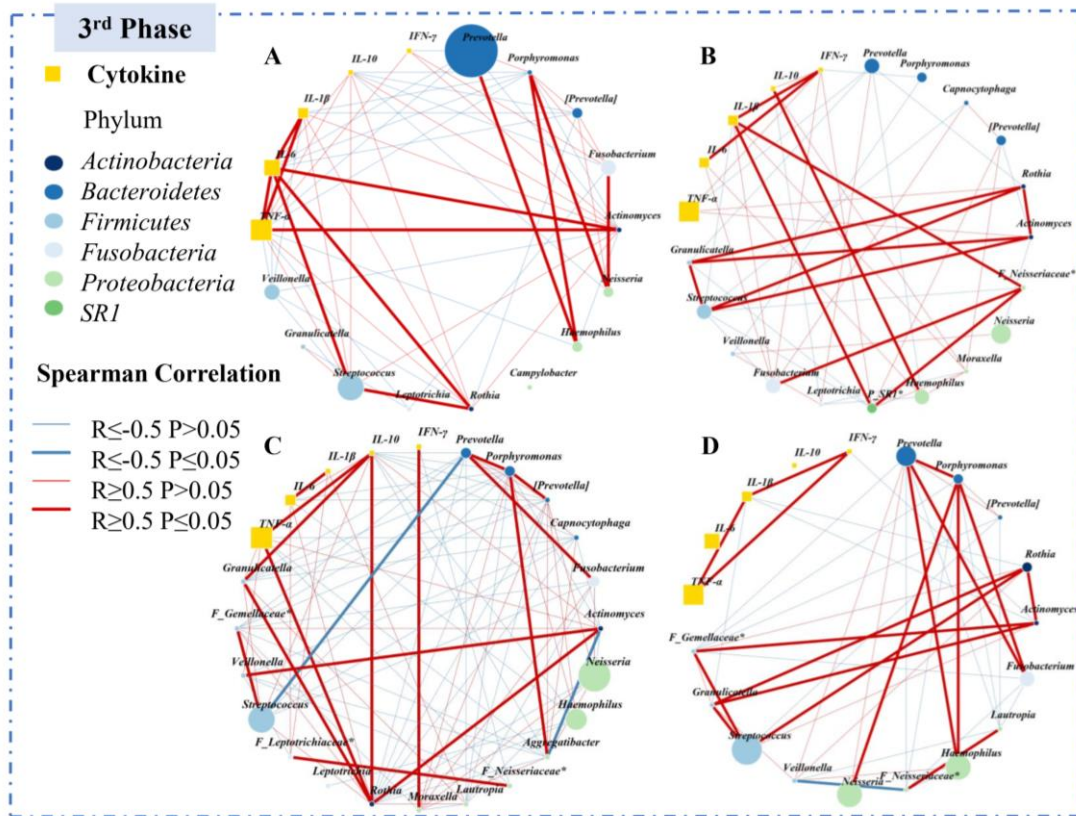

2
